# Supplementary material for: Gene editing of PKLR gene in human hematopoietic progenitors through 5’ and 3’ UTR modified TALEN mRNA
Source: PubMed Central journal article supplement (PMC6795450; doi:10.1371/journal.pone.0223775), 2019-10-16

**A**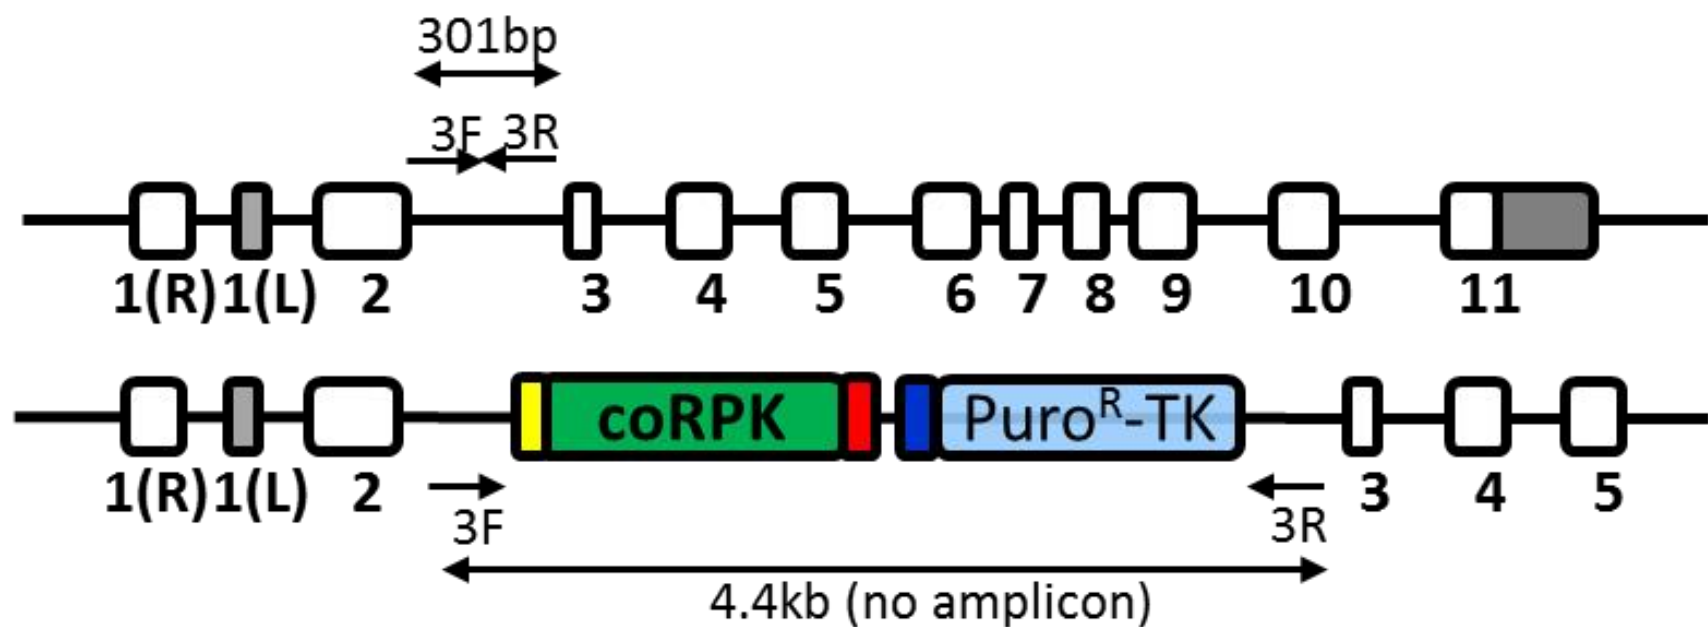**B**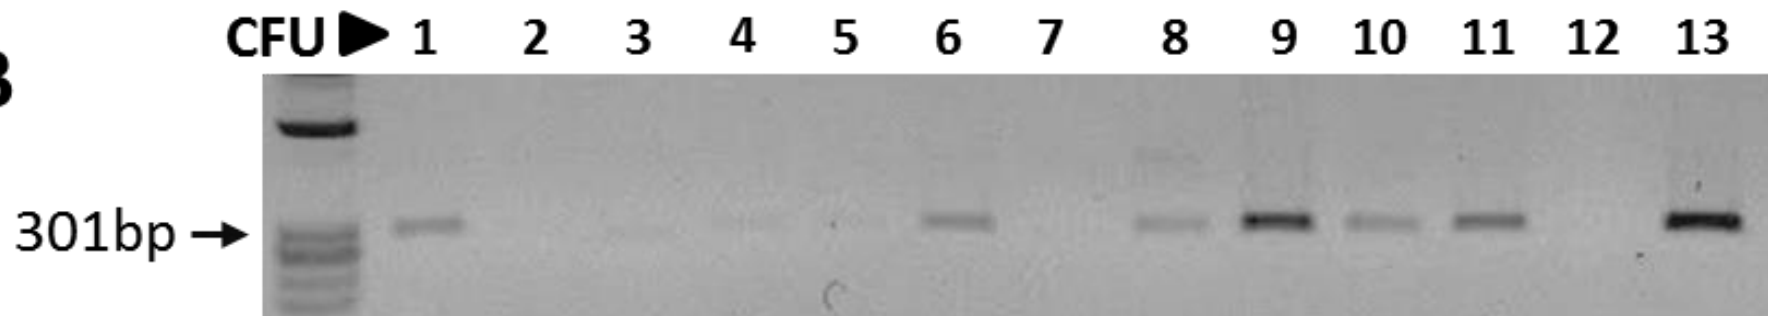

Supplement: pone.0223775.s001.pdf [file pone.0223775.s001.pdf]
